# Supplementary material for: Changes in bursal B cells in chicken during embryonic development and early life after hatching
Source: PubMed Central journal article supplement (PMC6238004; doi:10.1038/s41598-018-34897-4), 2018-11-15
Supplement: 41598_2018_34897_MOESM1_ESM.pdf [file 41598_2018_34897_MOESM1_ESM.pdf]

*Supplementary Information*

**Changes in bursal B cells in chicken during embryonic  
development and early life after hatching**

Kwang Hyun Ko<sup>1,2</sup>, In Kyu Lee<sup>1</sup>, Girak Kim<sup>1</sup>, Min Jeong Gu<sup>1,2</sup>, Hyun Young Kim<sup>3</sup>, Byung-Chul Park<sup>4</sup>, Tae Sub Park<sup>4</sup>, Seung Hyun Han<sup>3</sup> and Cheol-Heui Yun<sup>1,2,4\*</sup>

<sup>1</sup>Department of Agricultural Biotechnology and Research Institute for Agriculture and Life Sciences, Seoul National University, Seoul 08826, Republic of Korea

<sup>2</sup>Biomodulation Major and Center for Food Bioconvergence, Seoul National University, Seoul 08826, Republic of Korea

<sup>3</sup>Department of Oral Microbiology and Immunology, Dental Research Institute, and Brain Korea 21 Plus Program, School of Dentistry, Seoul National University, Seoul 08826, Republic of Korea

<sup>4</sup>Institute of Green Bio Science Technology, Seoul National University, Pyeongchang 25354, Republic of Korea.

**\*Correspondence:** Cheol-Heui Yun: cyun@snu.ac.kr

21 **Supplementary Figures**

22

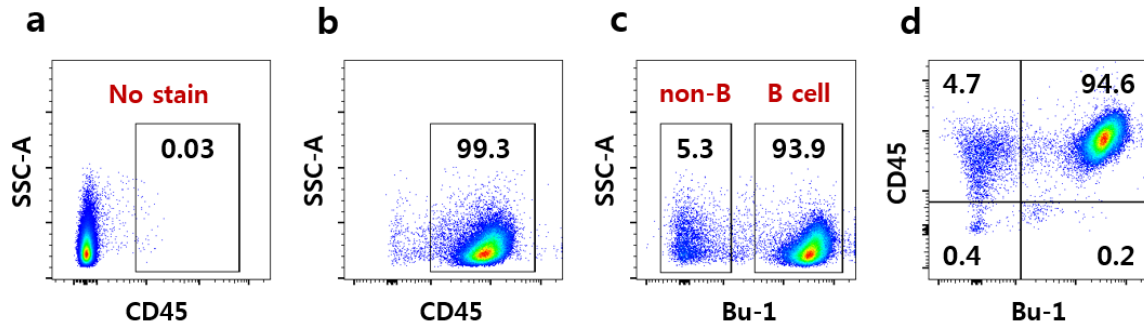

23

24 **Supplementary Figure 1. Flow cytometric gating strategy for chicken B cells.** To gate and  
25 analyze chicken B cells, CD45 and bu-1 antibodies were used. Single cells from bursa of  
26 Fabricius were shown (a) without stain, and stained with (b) anti-CD45, (c) anti-bu-1 or (d)  
27 both anti-CD45 and anti-bu-1 antibodies. The number in each area indicates the percentage of  
28 the cells.

29

30

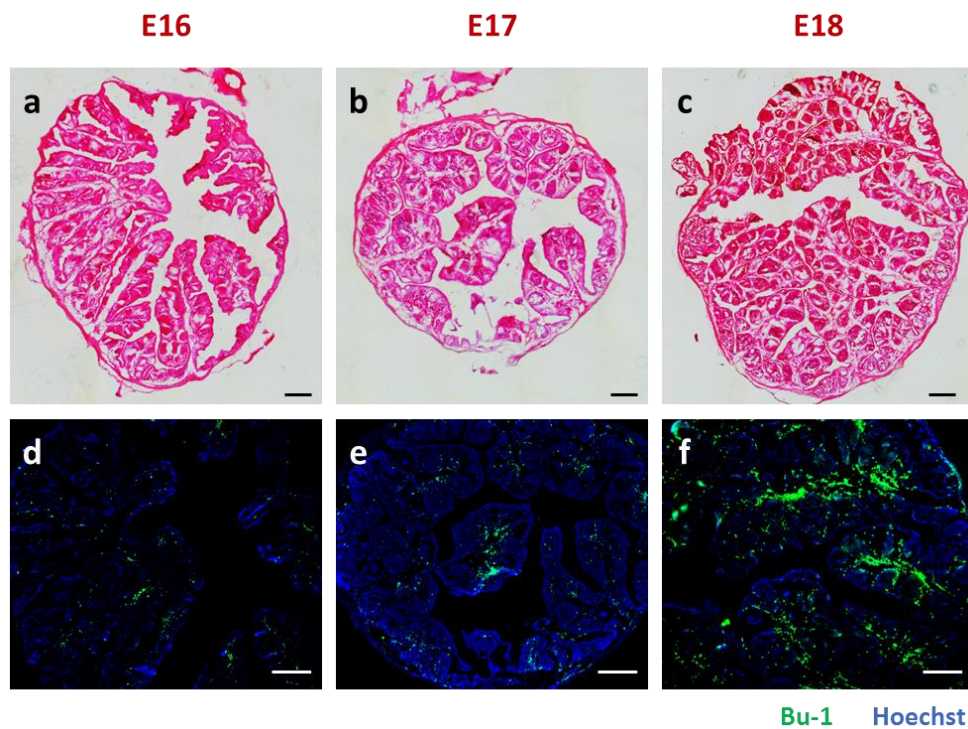

31

32 **Supplementary Figure 2. Histological analysis and immunohistochemical staining of bu-**  
 33 **1 in embryonic bursa.** Bursal tissues from chicks at E16 to E18 were fixed and  
 34 cryosectioned. The images for H&E staining and IHC were obtained from adjacent sections.  
 35 (a-c) bursal cryosections were stained with hematoxylin and eosin (H&E) for histological  
 36 analysis. (d-f) the cryosections were stained with bu-1 antibody (green) and hoechst (blue),  
 37 and visualized by digital inverted fluorescence microscope. One of the representative pictures  
 38 with similar result from at least 5 samples per embryonic stage is shown. Scale bars  
 39 correspond to 100  $\mu$ m.

40

41

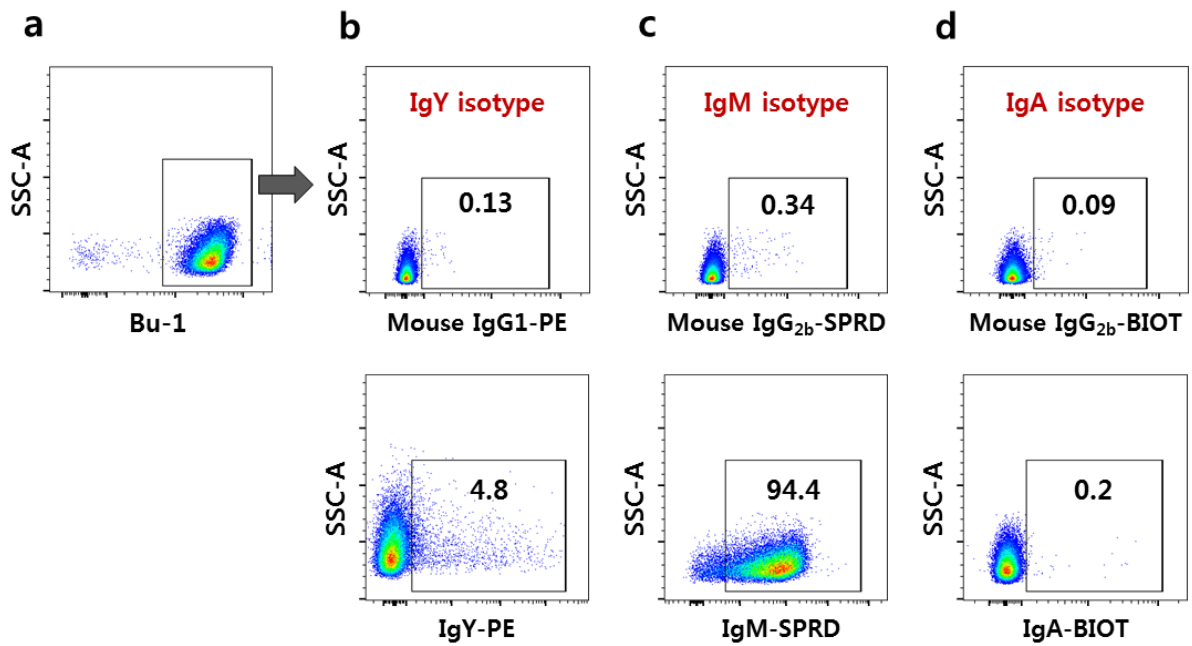

42  
 43 **Supplementary Figure 3. Gating strategy for Ig expression on bursal B cells.** Single cells  
 44 produced from the bursa of 1-week-old chicks were stained with anti-bu-1 antibody or  
 45 together with anti-IgY, -IgM or -IgA antibody followed by streptavidin-conjugated BV605.  
 46 Then, background level was examined by using isotype control for the IgY, IgM, and IgA  
 47 antibodies, respectively. (a) Bursal B cells were first identified by bu-1 gating, and then (b)  
 48 IgY-, (c) IgM-, and (d) IgA-producing B cells were examined by flow cytometry. The number  
 49 in each area of the panel indicates the percentage of the cells.

50

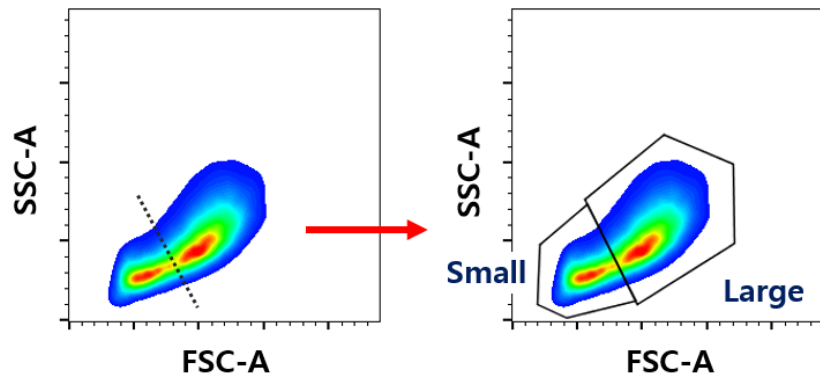

51

52 **Supplementary Figure 4. Flow cytometric gating strategy for small and large B cells.**

53 Bursal cells were gated on bu-1<sup>+</sup> cells and distinguished by the cell size by using flow  
54 cytometry. The population gated at low forward scatter with low side scatter indicates small B  
55 cells whereas high forward with high side scatter indicates large B cells.

56

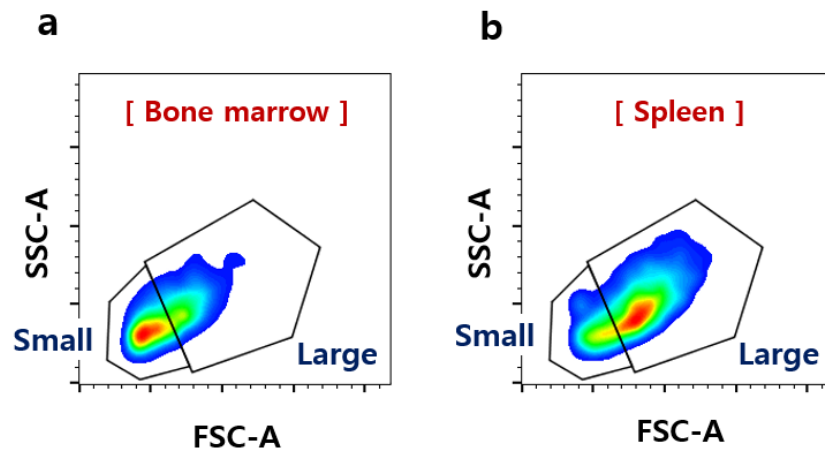

57

58 **Supplementary Figure 5. Analysis of small and large B cells in the spleen and bone**  
59 **marrow.** The single cells of (a) bone marrow and (b) spleen were gated on bu-1<sup>+</sup> cells and  
60 divided by the cell size and granularity by using flow cytometry, same as in **Supplementary**  
61 **Fig. 4.**

62

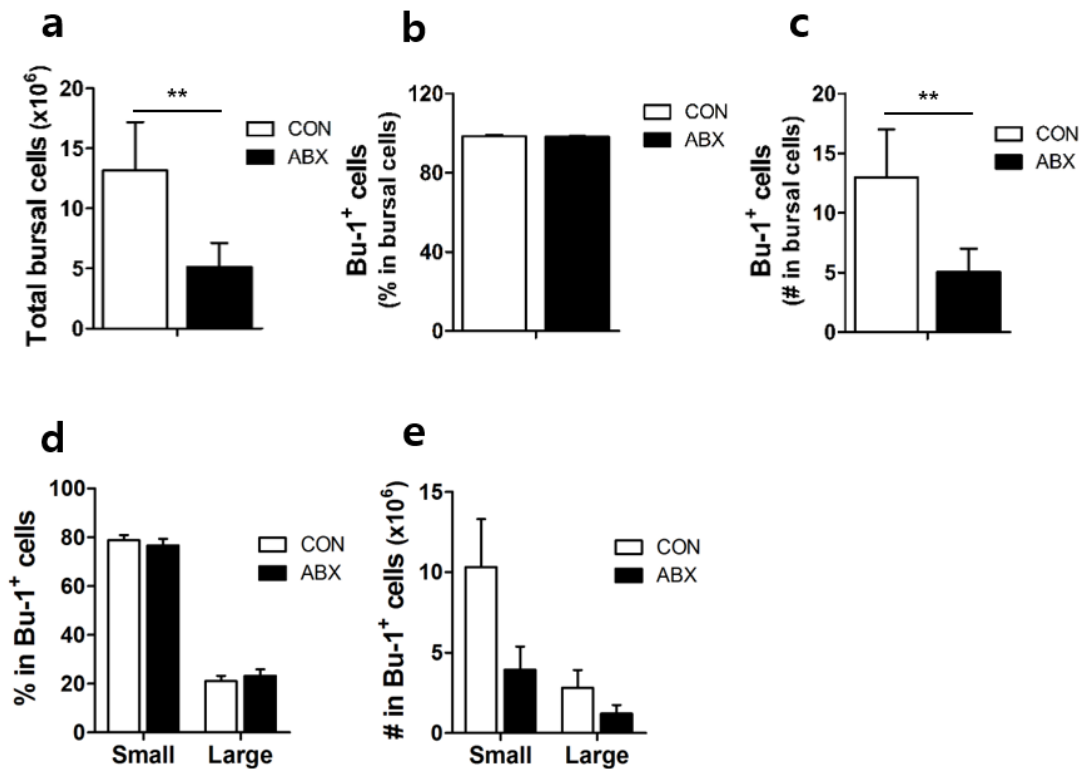

63

64 **Supplementary Figure 6. Commensal microbiota affects the development of bursal B**

65 **cells.** Newly hatched chicks were given the combination of different antibiotics consisting

66 ampicillin (100 mg/l), gentamycin (100 mg/l), metronidazole (100 mg/l), neomycin (100 mg/l)

67 and vancomycin (50 mg/l) in drinking water for 1 week. Bursal cells from control (CON) or

68 antibiotics (ABX)-treated chicks were analyzed for (a) absolute number of bursal cells, (b)

69 percentage and (c) absolute number of bursal B cells, (d) the percentage and (e) absolute

70 number of small and large B cells in bursa. Data represent the mean  $\pm$  SD. Similar results

71 were obtained from three separate experiments. **\*\* $P < 0.01$ .**
